# Supplementary material for: Deep-Sea Origin and In-Situ Diversification of Chrysogorgiid Octocorals
Source: PubMed Central journal article supplement (PMC3377635; doi:10.1371/journal.pone.0038357), 2012-06-18

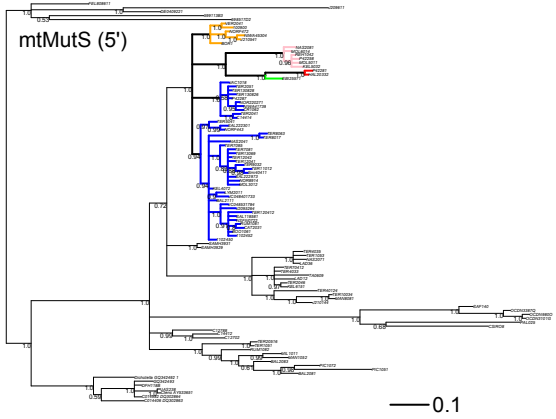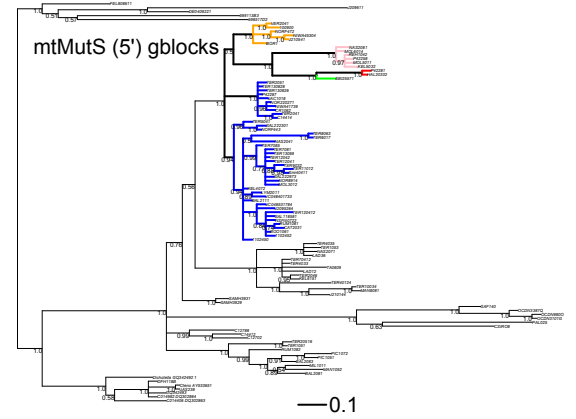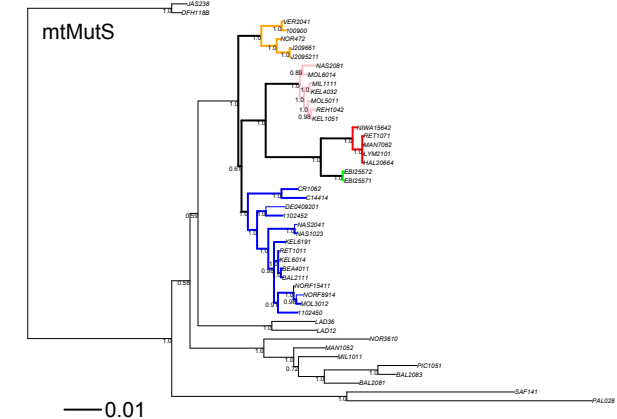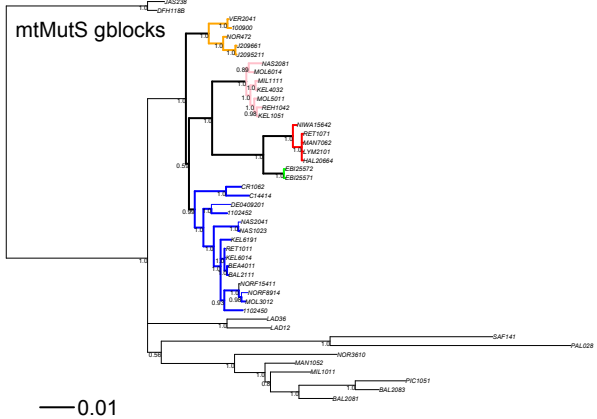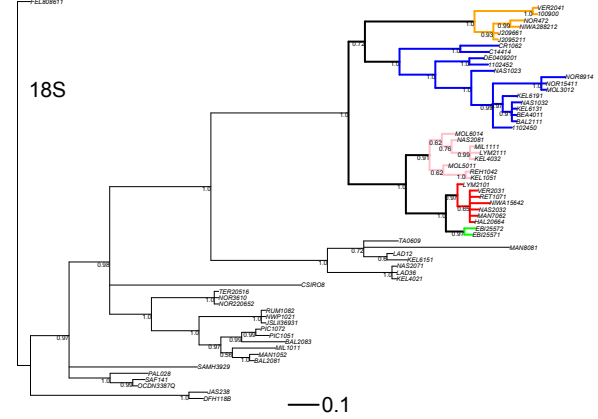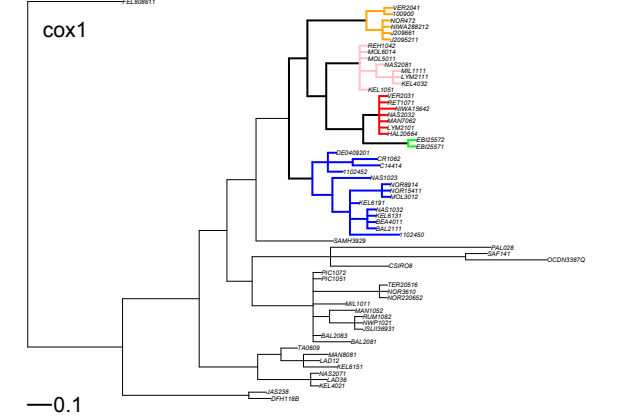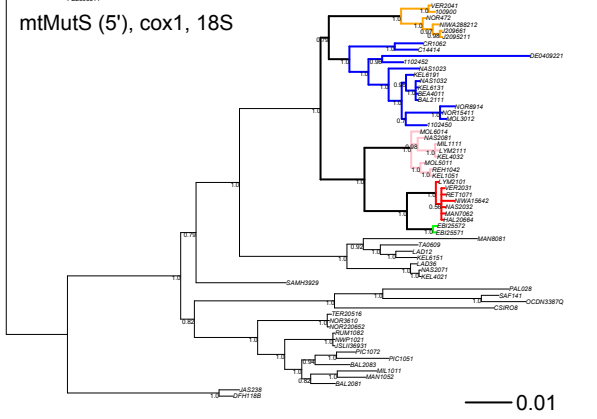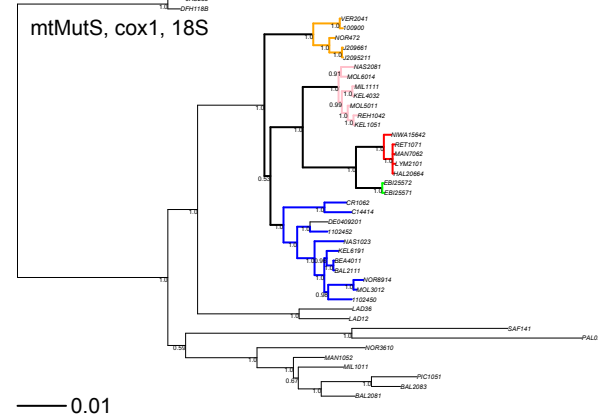

Supplement: pone.0038357.s001.pdf [file pone.0038357.s001.pdf]
